# Supplementary material
Source: PubMed Central journal article supplement (PMC4682308)
Supplement: supp_tpc.15.00829_TPC2015-00829-RAR1_Supplemental_Data_pdf_Figures_and_Tables_.pdf [file supp_tpc.15.00829_TPC2015-00829-RAR1_Supplemental_Data_pdf_Figures_and_Tables_.pdf]

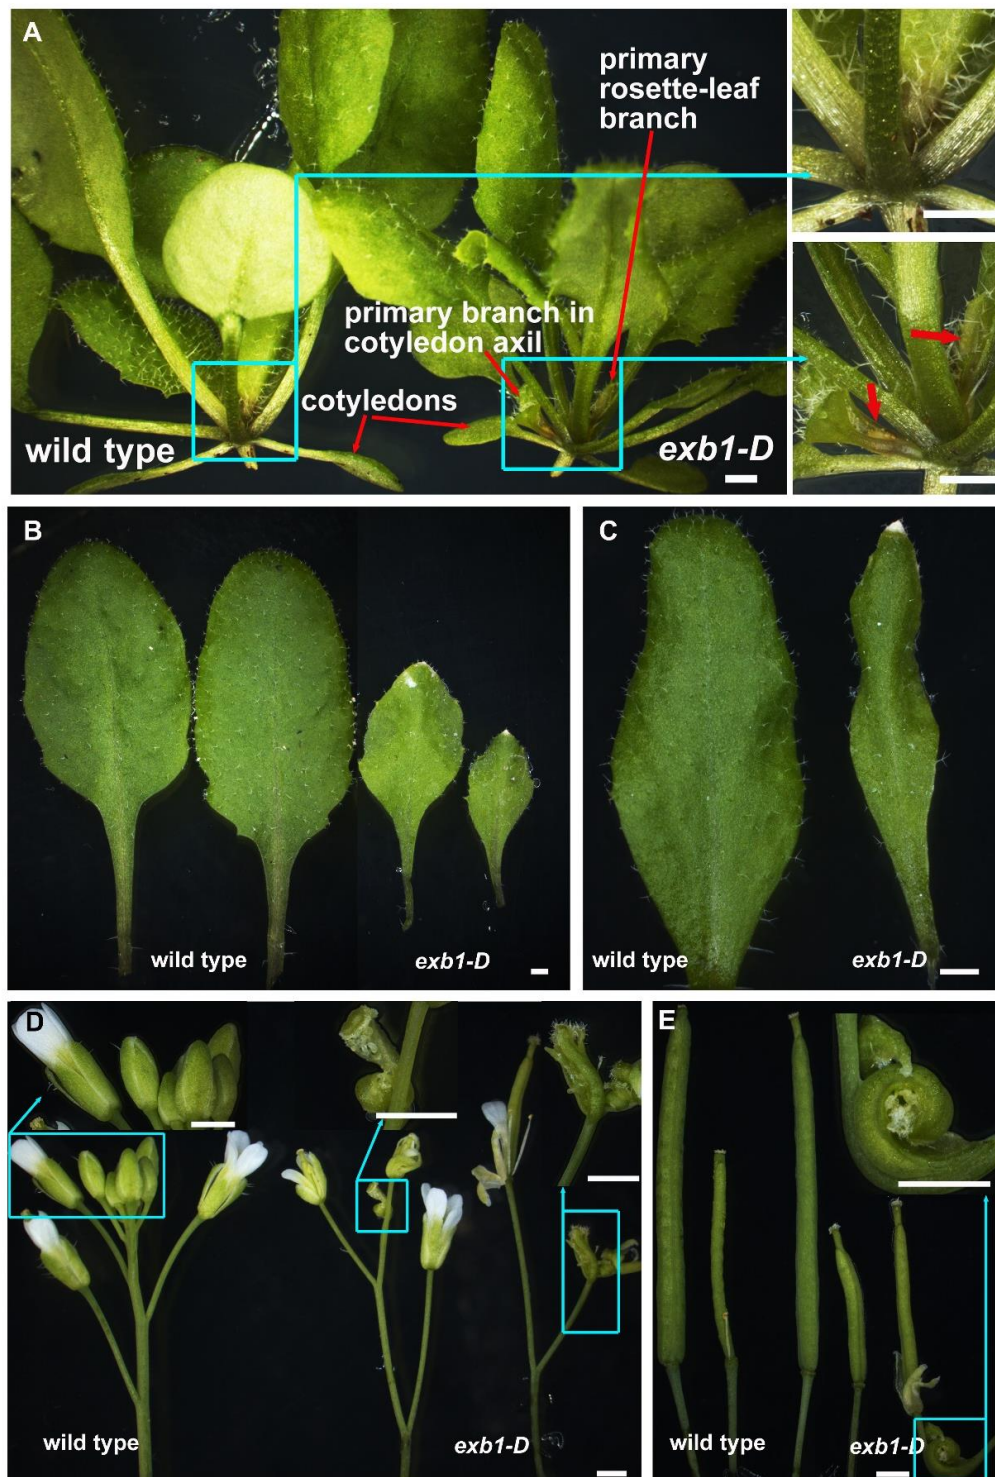

**Supplemental Figure 1.** The Mutant *exb1-D* Displayed Pleiotropic Phenotypes and Produced Branches in the Axils of Cotyledons.

- (A) Branches were developed in *exb1-D* but not in wild-type plants.
- (B) and (C) Deformed rosette leaves (B) and cauline leaves (C) were formed in *exb1-D*.
- (D) The *exb1-D* produced defective flowers with carpeloid sepals.
- (E) The *exb1-D* formed abnormal siliques with longer styles. Bars = 1 mm.

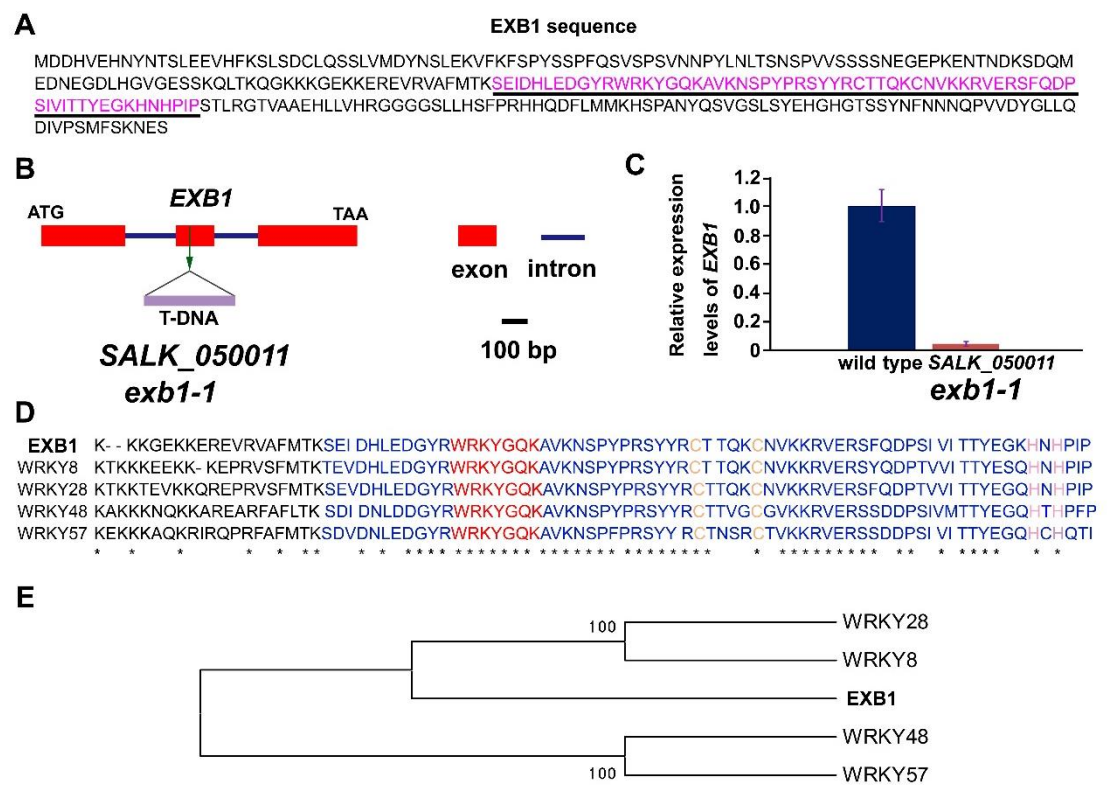

**Supplemental Figure 2.** *EXB1* Encoding WRKY71 Which Shares High Similarity with WRKY8, WRKY28, WRKY48 and WRKY57 in Amino Acid Sequence.

(A) The protein sequence of *EXB1*. The WRKY domain is indicated by pink color.

(B) The location of T-DNA insertion mutant *exb1* (*SALK\_050011*). The exons are indicated by red boxes, and introns by blue lines.

(C) The relative expression level of *EXB1* in wild-type plants and *SALK\_050011*. The expression level in the wild type was set to 1.0. The error bars represent the SD of three replicates.

(D) The alignments of WRKY domain of *EXB1* with that of WRKY8, WRKY28, WRKY48 or WRKY57. Letters in red indicate the high conserved WRKYGQK peptide sequence and letters in orange and pink indicate the zinc finger motif. Asterisks indicate the same amino acid residues.

(E) Phylogenetic tree of *EXB1*, WRKY8, WRKY28, WRKY48 and WRKY57 were generated based on the full-length protein sequences using maximum likelihood (ML) method.

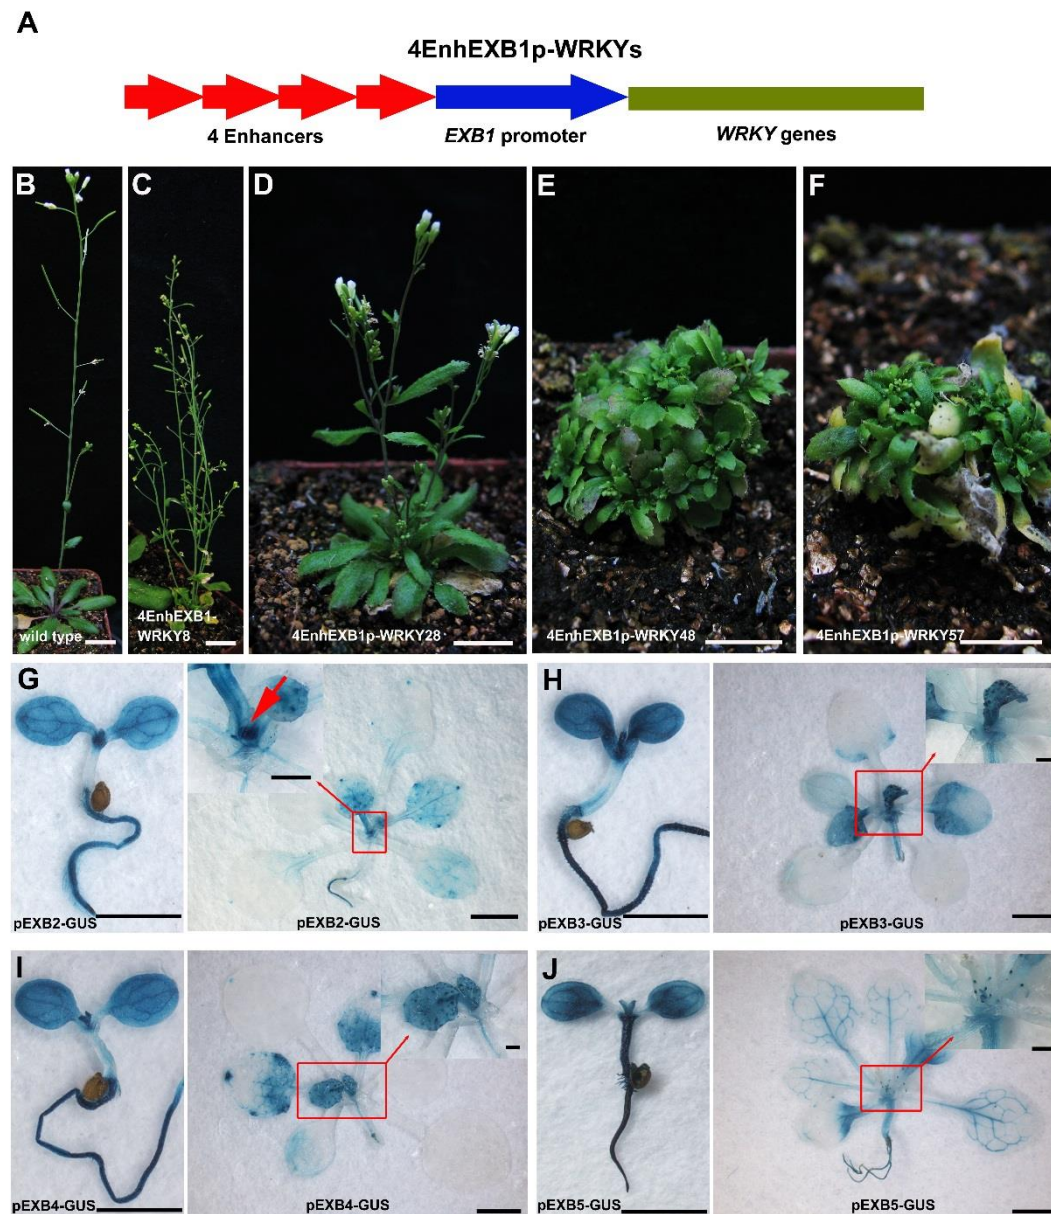

**Supplemental Figure 3.** EXB1 Had Highly Redundant Function With EXB2, EXB3, EXB4 and EXB5.

(A) Schematic representation of 4EnhEXB1p-WRKYs constructs.

(B) to (F) The phenotypes of 4EnhEXB1p-WRKY8 (C), 4EnhEXB1p-WRKY28 (D), 4EnhEXB1p-WRKY48 (E), and 4EnhEXB1p-WRKY57 (F) transgenic plants. The transgenic plants displayed excessive branching similar to that observed in *exb1-D* when compared to wild-type plants (B).

(G) to (J) The expression patterns of *EXB2* (G), *EXB3* (H), *EXB4* (I), and *EXB5* (J). The four genes had overlapping expression patterns with *EXB1*. Bars = 1 cm in (B) to (F), 1 mm in (G) to (J), and 100  $\mu$ m in the insets of (G) to (J).

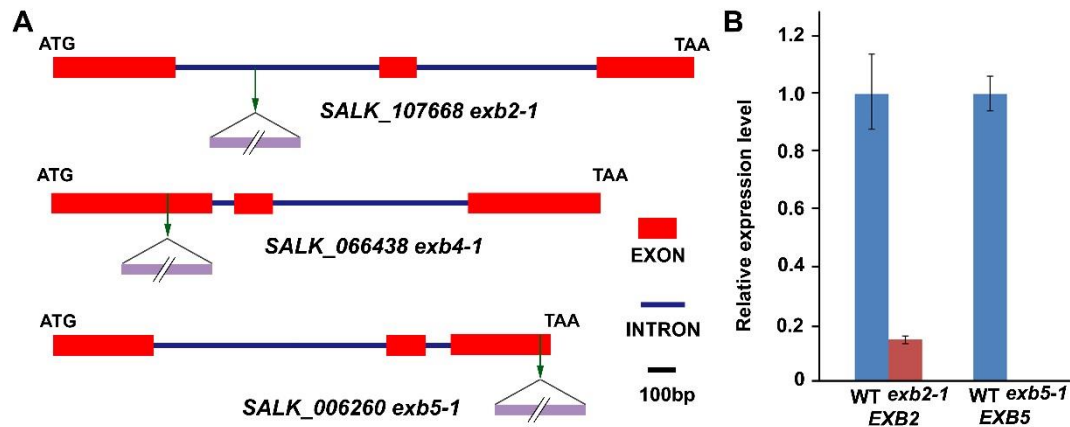

**Supplemental Figure 4.** The Identification of *exb2-1*, *exb4-1*, and *exb5-1* Mutants.

(A) Schematic representation of T-DNA locations in the *exb2-1*, *exb4-1*, and *exb5-1* mutants.

(B) The relative expression level of *EXB2* or *EXB5* in the *exb2-1* or *exb5-1* mutants. *EXB2* was knocked down in *exb2-1* and *EXB5* was knocked out in *exb5-1*. The expression level of *EXB2* or *EXB5* in wild type was set to 1.0. The error bars represent the SD of three biological replicates.

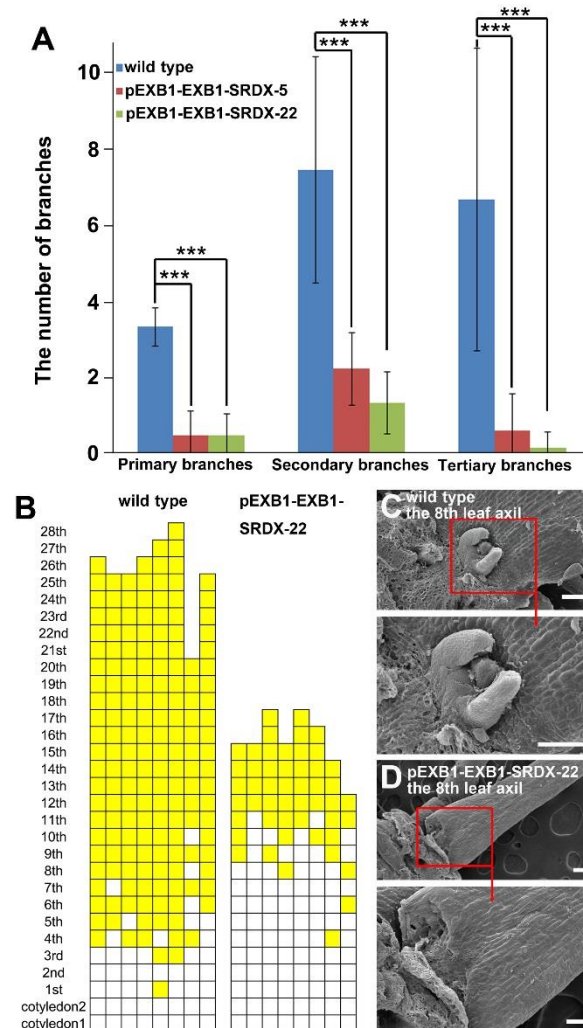

**Supplemental Figure 5.** Disruption of EXB1 Caused Fewer Branches in pEXB1-EXB1-SRDX Transgenic Plants.

(A) The number of branches of 45-day-old wild type and pEXB1-EXB1-SRDX transgenic lines. Branch numbers were the average of more than ten plants. Two-tailed t-test was used to test the significance. Three asterisks represent  $p < 0.001$ .

(B) The statistic analysis of AMs in each leaf axil of 50-day-old wild type and pEXB1-EXB1-SRDX-22 transgenic line in a short-day condition. Each column represents one independent plant and each row presents the position of the axils. The typical leaf axil morphologies represented by the two color grids were shown in (C) and (D). The white grids represent the absence of AMs; the yellow ones represent the AMs with leaf primordia. (C) and (D) The representative leaf axils of wild-plant and pEXB1-EXB1-SRDX-22. Bars = 100  $\mu\text{m}$ .

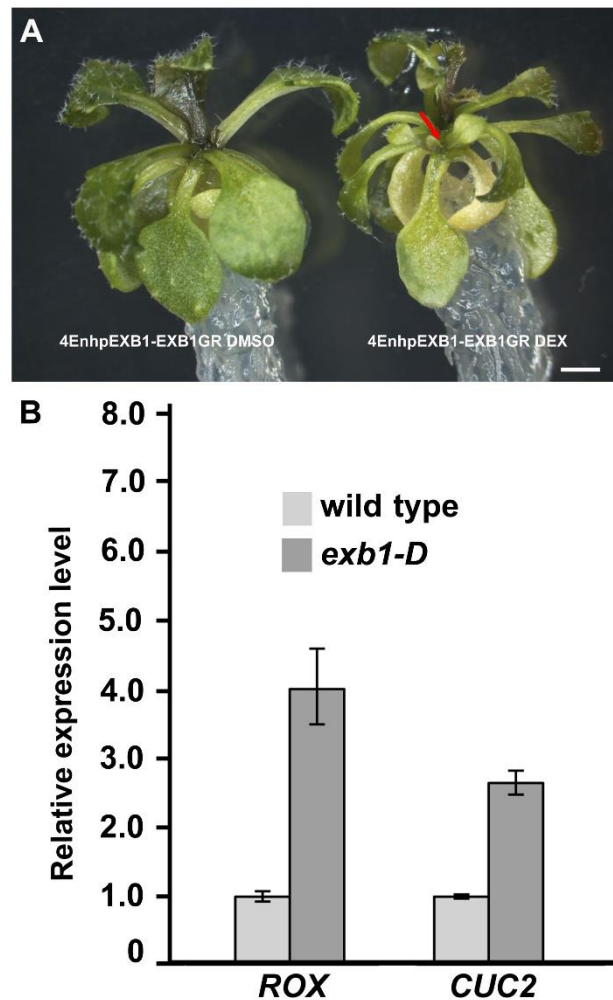

**Supplemental Figure 6.** 4EnhEXB1p-EXB1GR Transgenic Plants Produced More Branches after DEX Treatment and the RAX Downstream Gene *ROX* and *CUC2* Were Up-regulated Significantly in *exb1-D*.

**(A)** The phenotypes of 16-day-old 4EnhEXB1p-EXB1GR transgenic plants treated with DMSO or DEX for one week. The red arrow indicates one branch in a leaf axil. Bars = 1 mm.

**(B)** The expression level of *ROX* and *CUC2* was increased in *exb1-D*. The expression level of *ROX* or *CUC2* in wild type was set to 1.0. The error bars represent the SD of three biological replicates.

**A**

AACACCAATG**AGTCA**AATACTGTTTTCCCTCTTATGCTAATTATTCACATACTATTTCTACATATGCATTGAACATTACAACCTCAAGGGCAGACGTAGGAGAAA  
GGGATTGATGCAATCGTAAAT**TGAC**AAAAAGAAATTAAGGCCAAAGATCACCTGCAGTTCAAATTCCTTTATTATTTTCATTAAACCACTCAATAAATACGTGTT  
TTTAATTAAATTTACCTAGAAAAAATATTGTT**TGAC**ATTATTTGCCTCGACAAAGCTTCACCCAAAATCCAGTCCCTAGTACTTCACATGATAACACGATTTAC  
TCGAG**TGCA**AAATCCGACGTATAAGACTACAAATATAGACCATCAACCATTT**TGACT**AAAGACACCTTTCTTATATAGAAAAATATAAAATTAAGATATT  
AATATGCATATTTTAACTACAACATCACATATATTTAGAAATATTGTTTGGATTATTTTACATTAAAGAGTAGAAATTTGAGGATCTAATTT**TGAC**ATTC  
TTCACGGCATATAACATCTAGAAGTTGAAGGCACATACATACATAGCTTAATTACAATGTGATTATTATTACCATTGTTTAAATTCAGATTGTATTTAAAAA  
TTAATTTTTTTTTTAATAATTACTTATCAACCTAATATCCTATATGTTTGGGCTGTAGTGAATTTGCAGCCCAATTTGGAGATTTTAAACCCCTTAATTTATCTTAC  
AAGACTAGACAACATTTCAACAATAACAACCTAAGTTACCAGTTTACAAGAAAAAGAGAGAGGTTATTTCCCTATAATT**TGACT**AAAAAGATGTAACACAC  
GTATAAGTTCCTTTTGAACACATGTAAATGTAATATAGCAAATGTAAAGGATACACCACGAATCAGGAAACCTTTGTTGGCCATTTGTACCATATTACTTG  
CACATTTGTGGAAATGAGTGT**TGACT**ATATCTGCATGCGTAAATCAAAACACATGTACCTTAAATGATGTAACACAGTAGATCTATCAATTTGTACACATATAT  
ATGGATACATCGATGG**TGCA**TTATAGCTCTGAAGTTGATTAGTGGGCCAAAAATACACCTGATCATCATGATATTCATATATGTATAGATATATAGAGCACA  
TATCAGGAACTCATCTATGTACATATATTTATATGTTTGTGAAAAAATAATTCAAAAGATTTTATTCATGCATGCAAGTGTCCATCAAAGTAGTACGAATGA  
ATAATTATGAAGGGTCTTTTGGCACTTTACTAAATGTAATATGAAAAACAACATTGGTAA**TGCA**ACTCGTGATGATACATTTTGGTTAATAGAAATTTACACA  
AAAAATTGAGTTTGTTTTTT**TGCA**CTTTATAATCAGACAGTCCATATAGTTCACCTGGTCCGTCGAATGCAATCTCTCTCCACATGTTTCTCTCTTTTAT  
CCGTGTAATATCAACACCCTTGGGACTGTTTTTTTTTCTTTTTCTTTTACTTTTGAAATTCATGATGAAAACCTAAGTACGAGTTGATGTGCATATGTAT  
GAAAATACATTTGGACGAGTCAAAATCAAGAAACCTCTGATAATTTAGTTAA**TGACT**TTTTTTTTT**TGCA**ACTCATTACAAAGTCTGGATTTTAAATTT  
TGCAATTTCTCTTGATTAATGATTCAATTTTGATTGTTTGGAGTTTGGACCATGCGTATG**TGCA**CAACCAAGTTACTCTGGAATTTACTCTGGATTTGGTAG  
GGATTTCCGACTAACCCCAAGTTATGAAATAAAGACATTGAAATCCTCATAAAGAGGGATAAATAAGTTTATCTTTTGACAGTTAATTTGTTTAAACG  
TAATTTTATCAAGCAAGCGCGAGCTAAAAATAAATGAATAATTGAAATCTAATTTTCAAAACAGAAACAATAAATAGTAGT**TGCA**CTCATG**TGACT**  
TCTCCATACCCATAGCTTTAGAGACAAAATGAAATAAATAATTGGTCTCCAGATAAATAATATAATAATAATTGATAGGGTGTGCCAAATCCAAGTCTCT  
ATTAAAGGGCACATATTCAACTACTCTCCATAAACACAAAAAGTCCATCTAAAAAAGCAAGTAAGAGATAACAATTTCTCTCTTTTCTCTTTCTCTCT  
CAAACCTCAATTCATAACGAGAGAA**ATG**

**B**

TTCTCCCATAGAATATATGTATGTGTGGTGGCCTCGGGATCAATCACTTT**TGAC**AATGCTTGTGGGAAAT**TGAC**TTAG**TCA**AACTTTCACTTGGTTTTT  
GGAAAAATAATTACACATCACTTTACCTTTTCTCTGATTTTGGTTTTTAAT**TGCA**ACTTTTCGTTTTATTTTATTTTCTTATCACT**TGAC**CTCGGGCTGTCCAT  
GAATATTTCTTTTTTTTTATTGGTAGTGTACTAAGACAAAAATAAACCCATAAATGTT**TGACT**CTGCATGCACCATTTTACGTTTATATATATATATATA  
TATATATATATATATATATAATTTATGTT**TGCA**TAGTATAGTTTCGTATACCATGTAACATAACATATTATGTTGGTT**TGACT**TTTGGTTGGTTCCGATTTG  
GTTTAATCGAATACAGACCAAGCCGGTTATATCGATCGACTAAGCTTGTAGTCTCTTCAAGAGACAACCATGCGATGTTCAATCGTAATGTGGACA  
TTAAAGAAACCTTTAAACCATTTGTCCAATTTGTTTCTCTCACAAACCATTTGTCCAATTTCTTAAATAAAGAGACATTAAGAACTTAATTAATTAGTACT  
TATTGAATCTTCTTCAACAATTTGGTTTGTCTCTTTGATTCTTTCTCCACTATTCAACCTTAGACACAGCTGTTCTGTTTGCATTGG**TGAC**CAAAAACA  
CACTAAAAATTTATATGCACGTGTTTCTCTCTCCCTCTACATATAGATATATATATATATAATAATAATGAAGGTAATCCACATGGGGAGAGGAG  
AAAAAGCATAATGGAAGGAAAAATAGAAAATAGGTTCTCATT**TGACT**TGAGCGTTTCCAATACATAGAGCAATAAATAGATGCTTTATCTTTGATAATTACAG  
AACCAGAGAACTCTTTTCTTTTCCCTTCTCTCTTTCAAAAAACAAAAAGATATCTCAACCAAAACACTTAGACCAAGAGAGACAGATAGAGAG**ATG**

**C**

TTCTTTTAGCCTTTTGTTTTTTCAATATTCATACTAATGTAACACTACAATCATTGTATCATTCTATAATCATATGAATTTTT**TGCA**ACCATGCATTATGCTA  
GTTTAAATTTAGGTGATGATACATTTAAGATATTTTAAAGTACAAATCAATAGGGGCCATGTTCTTATGCTTTATCTAATCTTATGAATTTGTGTTTTATATATTATG  
AAAAATTTGAAAAAGAGAGATGGCCTACGCTCAAGACCAATTCCTACCAATGGGCAATGGTGTGAAATCTGAACAAAAAATTTCTCTTTCTTTAACGTTAG  
CTTTAAAGTTCAAAAACCTTTTACTTTTTCAGTGATAATTTCTGTATAAAATAACATATAACATAGAGAAAAAATCTAATAATTTGAATCGCTTAT**TGACT**TTT  
ATTTCTCCAAGTGCT**TGACT**TTTTAAACCCCTAATGTCCAATCTCAACTAAAG**TGCA**ACTTTTTCGTTCTGCTAGAAAG**TGCA**AGTTCATTAAGTTTCAATTTGAAG  
TATACAGTAAATTTAGTACTTTTTATTTTATTTAAACCACAGTTCAATGGCTGTATGAGATTTCTGTTCAAGAAAAACATATAAATCGAAACCAAGCAAGAAAG  
ACATTTATTTGCTTCGGTTCTTCTACTCAAGCTCATTTTGTAGTAAACTAAATTTGATTTTCTTAAAAAGTTAATTTGTTTTTTGTAATAATCAGTTTTA  
CCAAATTTGACACAATAATGAATATATGCTATGCTAGTTTTTTTTAGCTCAGAATATATCTTATGTGAATAGAATCGTCTATCAGATATTTTGTGATGCAG  
ATAGAATTCACCGTTATAGAATCATTTGTAGATTGTTTCATCGTGATTGTTAAGATTAGATTTCCATTTGTAATATAACAGAACTCGAAAGTACTTATATTA  
GTATTAACGATGTATCATG**TGAC**CAAAAATAGAAAATCTACGTAATGATGATTATTAAGCGAGTGTGATAGTAATCAAAATTTTCAATTAATCAATCTTTG  
ATACACTCTTTAGAGTAATGATTATCTTTCTATTGTTTTACCTGGGATTAATAAGTTTACCGGATCCGGAGTAGAATTTCTCGGTTTGGCAATTTTGT  
CACCTACCATAACGAATTTTACCTTATACTTTAGTTTCAATCTACTTTTGGTGATCTCTTTCATTTTCAACTGCAAGAAAGTAGTAAAAAGATCCAATACATA  
ATATATTTAATTTATCATAGTAAGTAACTAGTAAAGAAAGACTAAAGTACTTTTTAAATATGATTTTGTATTTCCCGATGTGAAAGAAAGAAATTTGAATTTG  
CACATATCAATAATATTAGCTAGGAAAAAATTTGTGAGAAATTTCTT**TGAC**AGCTTGCCTGTGCAATAGTCTTCTTATCTCTACCATTTCTTAATTCAC  
TATTGTATAGTATTACTTATGTTGAATTAATAAATAAATTAATTTCCCTAAAGTTACTTTTGTATTTTGTATTTTCTATTTTATACAACCTTTCTTACT  
TTT**TGACT**CTTTTCTTCAAAAGACTTT**TGACT**CTCCCTCCAGCTATTATATAGATCTCTCTTTTCTTTTCTGCAATCACATAAATTTCCCTATATAGT  
TTACACAACATCATACCCCAACATATATACTTGATCATAGAGAGATAAACAGAGGCCGTATCAAGAACAGACTAAGAACAGACTTCACTAGGAGT  
ACAAG**ATG**

## Supplemental Figure 7. The Possible W-box *Cis*-elements in the Promoters of *RAX* Genes.

- (A) The possible W-box *cis*-elements in the promoter of *RAX1*.  
 (B) The possible W-box *cis*-elements in the promoter of *RAX2*.  
 (C) The possible W-box *cis*-elements in the promoter of *RAX3*. Red bold letters represent possible W-box *cis*-elements. Purple bold letters represent start codons of *RAX* genes.

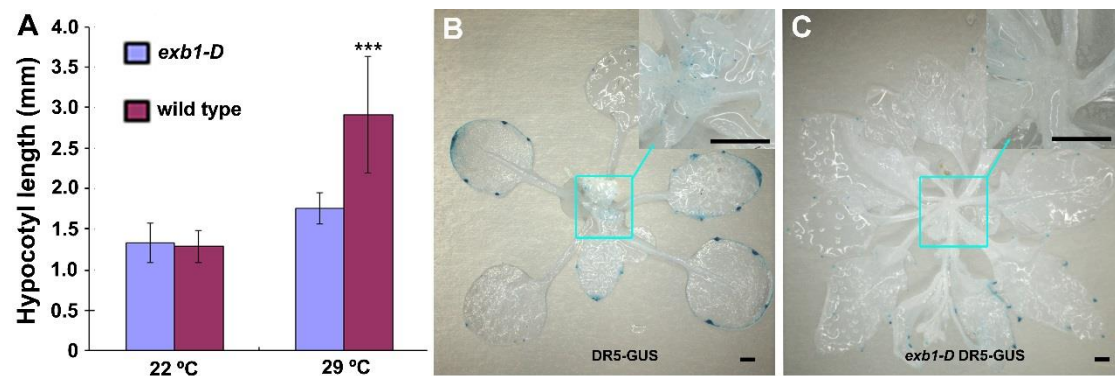

**Supplemental Figure 8.** The Auxin Homeostasis Was Compromised by *EXB1* Overexpression .

(A) The hypocotyl elongation of *exb1-D* was compromised in the treatment under 29 °C.  
(B) and (C) Auxin reporter DR5-GUS analysis showed that auxin pathway was affected by *EXB1* overexpression. Bars = 1 mm.

**Supplemental Table 1.** The transcript alteration of genes in auxin pathway by EXB1 induction.

| Gene ID   | Gene product | Value of mock-treated plants | Value of DEX-treated plants | Log2(fold change) | p_value   |
|-----------|--------------|------------------------------|-----------------------------|-------------------|-----------|
| AT1G70560 | TAA1         | 6.130240                     | 1.939510                    | -1.7              | 0.000378  |
| AT4G13260 | YUC2         | 0.878797                     | 0.455587                    | -0.9              | 0.158667  |
| AT1G04610 | YUC3         | 0.077682                     | 0.039684                    | -1.0              | 0.469674  |
| AT5G16530 | PIN5         | 5.950950                     | 1.099360                    | -2.4              | 0.000043  |
| AT5G15100 | PIN8         | 0.494479                     | 0.249029                    | -1.0              | 0.250873  |
| AT2G46530 | ARF11        | 3.966420                     | 1.745610                    | -1.2              | 0.007063  |
| AT3G61830 | ARF18        | 13.58180                     | 5.873470                    | -1.2              | 0.000174  |
| AT1G34410 | ARF21        | 0.029921                     | 0.000405                    | -6.2              | 0.578522  |
| AT1G52830 | IAA6         | 1.556270                     | 0.613108                    | -1.3              | 0.064486  |
| AT4G14550 | IAA14        | 2.936580                     | 1.232950                    | -1.3              | 0.0274252 |
| AT5G57420 | IAA33        | 0.407542                     | 0.078609                    | -2.4              | 0.1609220 |
| AT4G28720 | YUC8         | 0.102336                     | 0.551910                    | 2.4               | 0.0045511 |
| AT3G23050 | IAA7         | 104.1030                     | 222.0350                    | 1.1               | 0.0002182 |
| AT3G17600 | IAA31        | 0.059568                     | 0.188590                    | 1.7               | 0.2857590 |

**Supplemental Table 2.** The primer list used in this work

| Primer name | Primer sequences (5' - 3')                                       |
|-------------|------------------------------------------------------------------|
| EXB1-1      | atgGATGATCATGTTGAGCACAATT                                        |
| EXB1-2      | tcaAGACTCGTTCTTGGAGAACATT                                        |
| EXB1-2N     | AGACTCGTTCTTGGAGAACATT                                           |
| EXB1-3      | caccATGGATGATCATGTTGAGCACAATT                                    |
| Enh-1       | CTAGAGCTAGTAGATCCCCAACATG                                        |
| Enh-2       | AACACTGATAGTTTCGGATCTAG                                          |
| EXB1-SRDX   | ctaAGCGAAACCCAAACGGAGTTCTAGATCCAGATCCAGAGACTCGTTC<br>TTGGAGAAACA |
| EXB1P-1     | GGGGACAACCTTTGTATAGAAAAGTTGCTGAAGGTTTTTTGGCTCCCTAA               |
| EXB1P-2     | GGGGACTGCTTTTTTTGTACAACTTGCTGAAGAAGAGGAGAAAGA                    |
| EXB1P-3     | caccGAAGGTTTTTTGGCTCCCTAA                                        |
| EXB1P-4     | TGAAGAAGAGGAGAAAGA                                               |
| GR-1        | atgATTCAGCAAGCCACTGCAGGAG                                        |
| GR-2        | TGCTCAACATGATCATCCATTCATTTTTGATGAAACAGAA                         |
| GR-3        | TTCTGTTTCATCAAAAATGAATGGATGATCATGTTGAGCA                         |
| RAX1P-1     | AACACCAATGAGTCAATACTGTTTT                                        |
| RAX1P-2     | TTCTCTCGTTAGTGAATTGAAGTTT                                        |
| RAX2P-1     | TCTTCCCATAAGAATATATGTATGT                                        |
| RAX2P-2     | CTCTCTATCTGTCTCTCTTGGTCTA                                        |
| RAX3P-1     | TCTTTTAGCCTTTTGTTTTTTTCAATA                                      |
| RAX3P-2     | ACTTGTA CTCTAGTGAAGTCTTGTTCT                                     |
| FLUC-1      | caccATGGAAGACGCCAAAAACATAAAGA                                    |
| FLUC-2      | ttaCAATTTGGACTTTCCGCCCTTC                                        |
| 35S-1       | GCCAACATGGTGGAGCACGACACTC                                        |
| 35S-2       | AAGCTCGAGAGAGATAGATTTGTAG                                        |
| VP16-1      | GCCCCCCCCGACCGATGTCAGCCTGG                                       |
| VP16-2      | ctaCCCACCGTACTCGTCAATTCCA                                        |
| VP16-3      | caccGCCCCCCCCGACCGATGTCAGCCTGG                                   |
| G4DBD-1     | caccATGAAGCTACTGTCTTCTATCGAAC                                    |
| G4DBD-2     | ttaTTGATTCGACCTCGACGATACA                                        |
| EXB1 RT-1   | CCATGGGACCTCTAGTTACAATTTT                                        |
| EXB1 RT-2   | TAATGCAACCATAACGATACGATCT                                        |
| EXB2 RT-1   | CATCTCCCTCCTCCATTACCA                                            |
| EXB2 RT-2   | TCAAGGGTTGCGCATAGTTT                                             |
| EXB5 RT-1   | CTCGAAGACGGCTATCGTTGGAGAA                                        |
| EXB5 RT-2   | CGGATGGTTGTGTTGACTCTCGTAGG                                       |
| Actin8 RT-1 | TCCAGGCATTGTCCACAGAA                                             |
| Actin8 RT-2 | ACCTGCTCCTCCTTAGACAT                                             |

---

|           |                               |
|-----------|-------------------------------|
| ROX RT-1  | TCCACCACTTCCTCATCCTC          |
| ROX RT-2  | ACCAGGGACCATGCTTTGTA          |
| RAX1 RT-1 | CTCTCGGACAGCAACAACAA          |
| RAX1 RT-2 | CCTCTGGTCAATGTGGTGGT          |
| RAX2 RT-1 | TGGAAGCAGGTGGTCAGTAA          |
| RAX2 RT-2 | GCAATGGCTAAGTGGTGATG          |
| RAX3 RT-1 | TCTATCTTGAGCGCCAACAC          |
| RAX3 RT-2 | GGAGGCTCCTGAGAACAAGT          |
| CUC2 RT-1 | AAGCTCCAAGGATGAATGGG          |
| CUC2 RT-2 | TTGTTGAGGGTACTTTTCGTC         |
| DL1       | GACAACATGTCGAGGCTCAGCAGG      |
| EXB1 Co-1 | GTGTATGATGGTCGATGATCTGAGAT    |
| EXB1 Co-2 | TTGACGAGTAGAAAGAGTTGGAAGTA    |
| SPL-1     | caccATGGCGACTTCTCTCTTCTT      |
| SPL-2     | ttaAAGCTTCAAGGACAAAT          |
| WRKY8-1   | ATGTCTCATGAAATCAAAGA          |
| WRKY8-2   | TCAAGGCTCTTGTTTGAAGA          |
| WRKY28-1  | ATGTCTAATGAAACCAGAGA          |
| WRKY28-2  | TCAAGGCTCTTGCTTAAAGA          |
| WRKY48-1  | ATGGAGAAGAAAAAAGAAGA          |
| WRKY48-2  | TCATTTCTTATTCTCTTCAT          |
| WRKY57-1  | ATGAACGATCCTGATAATCC          |
| WRKY57-2  | TCAAGGGTTGCGCATAGTTT          |
| EXB2p-1   | caccTAATACACATTACAACATGATTGAA |
| EXB2p-2   | GACGAAGAACAAAGAGAAAAAACTT     |
| EXB3p-1   | caccTCAATCCTCTGCAACTTTTTGTTTT |
| EXB3p-2   | GGTGAAGAACAATGAAGAGAGAGGT     |
| EXB4p-1   | ccacACTTTTGAGACCCATGGTATGTATT |
| EXB4p-2   | GTAATAGAGAAAAGATGGAATCTAT     |
| EXB5p-1   | caccCGTTGTGGAGAGAGAGAGAGATC   |
| EXB5p-2   | GATGATTGATCGGCGAGAGAAGTAG     |
| LBb1.3    | ATTTTGCCGATTCGGAAC            |
| 050011LP  | GTAGCAGTGCCAGTGTGTCAG         |
| 050011RP  | AATGAAGGCGAGCCTAAAGAG         |
| 107668LP  | TTGACTGCTTTTTGGCCATAC         |
| 107668RP  | CTCGATCAAGAGAACGGTTTG         |
| 066438LP  | TTACCGGTGACCAGTGTTTTC         |
| 066438RP  | CTTTTTGGCCGTATTTTCTCC         |
| 006260LP  | TTTCCGTGGTGTGTTTGA CTG        |
| 006260RP  | CTGGCCGACATATCTATCGAG         |

---

## Supplemental Methods

### Plant Materials

*Arabidopsis* T-DNA insertion mutants were ordered from the *Arabidopsis* Biological Resource Center (ABRC, <http://abrc.osu.edu>). Homozygous mutants were genotyped by PCR using gene specific primers and T-DNA specific primer LBb1.3.

DR5:GUS line was crossed to *exb1-D* and the homozygous lines in the T3 generation were used for analysis.

### The High Temperature-induced Hypocotyl Elongation Assay

To perform the high temperature-induced hypocotyl elongation assay, the 5-day-old seedlings of wild type (Col-0) and *exb1-D* were transferred to new plates containing 1/2 MS (Murashige and Skoog) media. Then the plates were put vertically at 29°C or 22°C under long-day conditions for 7 days. The hypocotyl length of the seedlings was measured for statistical analysis. Two-tailed t-test was used to test the significance.

### Generation of Binary Constructs

To generate 4EnhEXB1p-WRKYs, the coding sequences of WRKY8, WRKY28, WRKY48 and WRKY57 were amplified from wild-type *Arabidopsis* genomic DNA using primer pairs: WRKY8-1 and WRKY8-2, WRKY28-1 and WRKY28-2, WRKY48-1 and WRKY48-2, and WRKY57-1 and WRKY57-2, respectively. The fragments were then cloned into pQDR2L3 vector to generate pQDR2L3-WRKYs. 4EnhEXB1p-WRKYs were generated by the LR reactions using the plasmids including pQDL4R1-4Enh, pENTR/D-pEXB1, pQDR2L3-WRKYs and pK7m34GW.

To analyze the expression patterns of *EXB2*, *EXB3*, *EXB4* and *EXB5*, the corresponding promoter regions were amplified from wild-type *Arabidopsis* genomic DNA using primer pairs EXB2p-1 and EXB2p-2, EXB3p-1 and EXB3p-2, EXB4p-1 and EXB4p-2, and EXB5p-1 and EXB5p-2, respectively. The fragments were cloned into pENTR/D-TOPO to generate pENTR/D-EXB2p, pENTR/D-EXB3p, pENTR/D-EXB4p and pENTR/D-EXB5p, respectively. pEXB2-GUS, pEXB3-GUS, pEXB4-GUS and pEXB5-GUS were generated by LR reactions between and pKGWFS7 and pENTR/D-EXB2p, pENTR/D-EXB3p, pENTR/D-EXB4p or pENTR/D-EXB5p.
